# Supplementary material for: Magnetic susceptibility of actinide(iii) cations: an experimental and theoretical study
Source: Royal Society of Chemistry journal article supplement (doi:10.1039/c5cp07456h), 2016-01-01
Supplement: c5cp07456h1.pdf [file c5cp07456h1.pdf]

## Supplementary information

### UV-vis-NIR spectrophotometry:

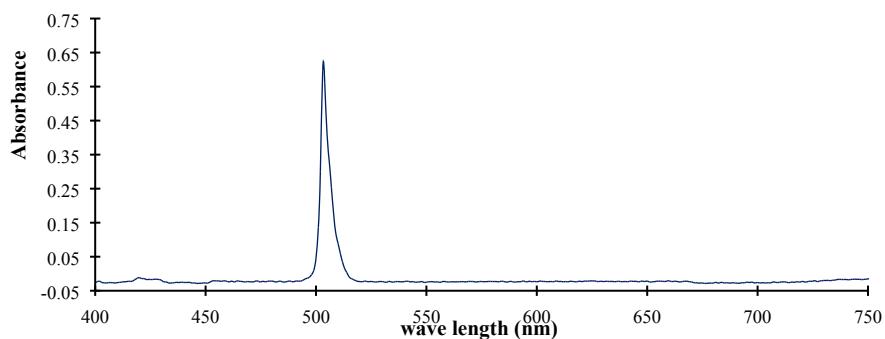

Figure ESI 1: UV-vis-NIR spectrum of Am(III) solution ( $C_{\text{Am(III)}} = 1.6 \cdot 10^{-3} \text{M}$ ) in 1M perchloric medium (sample 1-1).

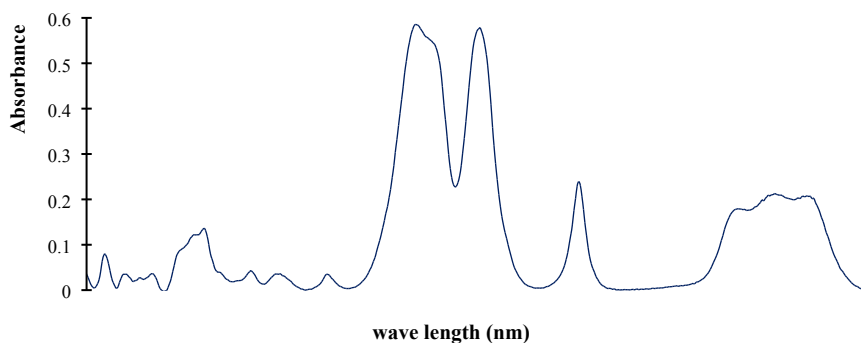

Figure ESI 2: UV-vis-NIR spectrum of Pu(III) solution ( $C_{\text{Pu(III)}} = 1.57 \cdot 10^{-2} \text{M}$ ) in 1M perchloric medium (sample 2).

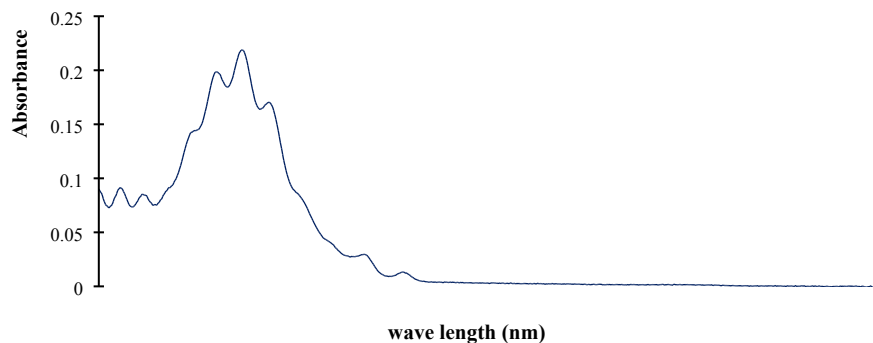

Figure ESI 3: UV-vis-NIR spectrum of U(VI) solution ( $C_{\text{U(VI)}} = 2.835 \cdot 10^{-2} \text{M}$ ) in 1M perchloric medium (sample 3).

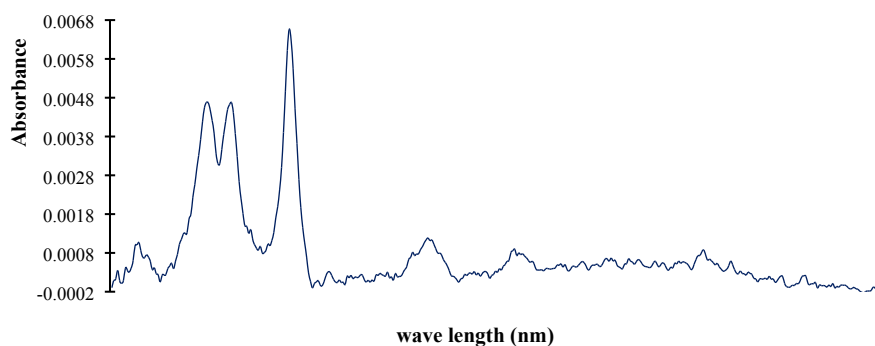

Figure ESI 4 : UV-vis-NIR spectrum of Cm(III) solution ( $C_{\text{Cm(III)}} = 1.64 \cdot 10^{-4} \text{M}$ ) in 1M perchloric medium (sample 5).

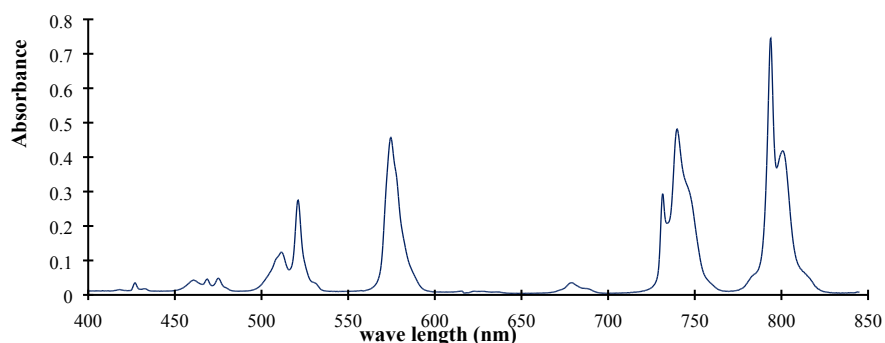

Figure ESI 5: UV-vis-NIR spectrum of Nd(III) solution ( $C_{\text{Nd(III)}} = 6.27 \cdot 10^{-2} \text{M}$ ) in 1M perchloric medium (sample 6-9).

### Temperature variation of magnetic susceptibility:

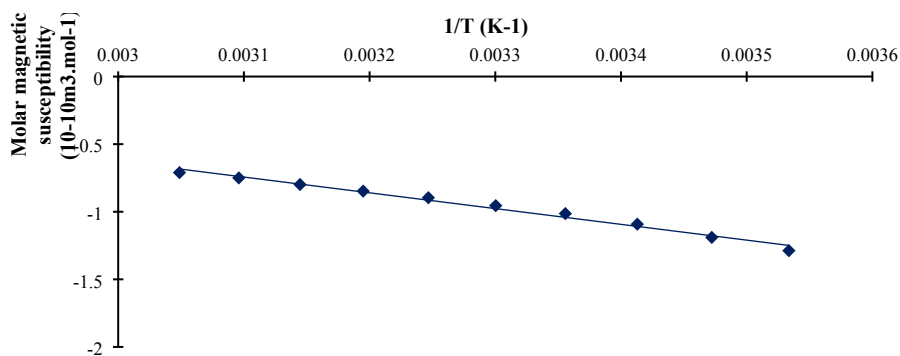

Figure ESI 6: Molar magnetic susceptibility variation vs.  $1/T$  for  $\text{HClO}_4$  solution.

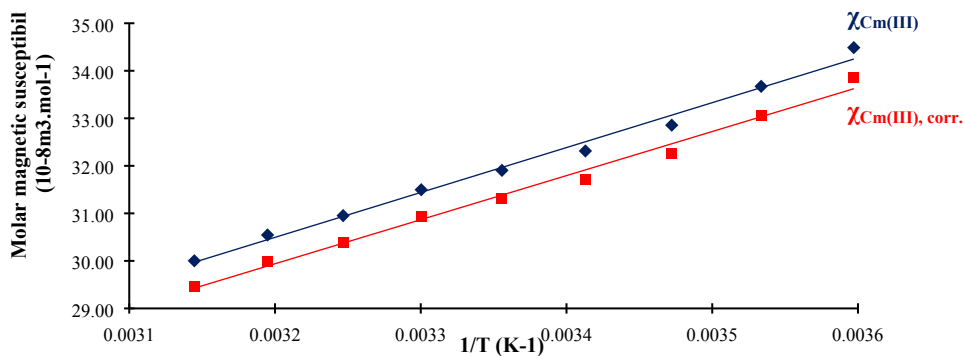

Figure ESI 7: Molar magnetic susceptibility variation vs.  $1/T$  for sample 5 before ( $\chi_{\text{Cm(III)}}$ ) and after ( $\chi_{\text{Cm(III), corr.}}$ ) correction of the  $\alpha$  emission effect in 1M perchloric medium.

## Computation results:

Table ESI 1: Energy (cm<sup>-1</sup>) of the free ion levels of Pu<sup>3+</sup> calculated with GRASP, SO-CASSCF and SO-CASPT2. 21 sextets, 188 quartets and 143 doublets are considered in the SO step for SO-CASSCF and SO-CASPT2.

| <i>J</i> | GRASP | SO-CASSCF | SO-CASPT2 |
|----------|-------|-----------|-----------|
| 5/2      | 0     | 0         | 0         |
| 7/2      | 2737  | 3130      | 3464      |
| 9/2      | 5513  | 6271      | 6809      |
| 3/2      | 8044  | 8418      | 7179      |
| 1/2      | 8071  | 8586      | 7474      |
| 11/2     | 8167  | 9086      | 9632      |
| 5/2      | 8432  | 8758      | 7368      |

Table ESI 2: Curie constants *C* (10<sup>-8</sup> m<sup>3</sup>.K.mol<sup>-1</sup>) and temperature-independent susceptibilities  $\chi_{TI}$  (10<sup>-8</sup>m<sup>3</sup>.mol<sup>-1</sup>) from SO-CASPT2 calculations for Pu<sup>3+</sup>. LS space: states included in the SO calculation; J space: states included in the calculation of  $\chi$ .

| LS space                       | J space | $\Delta E$ | <i>C</i> | $\chi_{TI}$ |
|--------------------------------|---------|------------|----------|-------------|
| <sup>6</sup> H                 | 5/2     |            | 111      | 0.00        |
| <sup>6</sup> H                 | 5/2;7/2 | 1762       | 106      | 0.55        |
| <sup>6</sup> H; <sup>4</sup> G | 5/2     |            | 141      | 0.00        |
| <sup>6</sup> H; <sup>4</sup> G | 5/2;7/2 | 2676       | 141      | 0.33        |

Table ESI 3: Energy gaps  $\Delta E_I$  in cm<sup>-1</sup>, magnetic moments  $M_I^u$  in  $\mu_B$ , Boltzmann weights  $P_I$ , truncated magnetization  $M_u^{0 \rightarrow k}$  in  $\mu_B$  and magnetic susceptibility  $\chi_M$  in m<sup>3</sup>.mol<sup>-1</sup> for [Pu(H<sub>2</sub>O)<sub>9</sub>]<sup>3+</sup> in a magnetic field of 9.4 Tesla and at T=298 K. Diagonalization of Hamiltonian of Eq. (1) is performed with 6 electronic states.

|                    | $\Delta E_I$ | $M_I^u$ | $P_I$ | $M_u^{0 \rightarrow k}$ | $\chi_M$                    |
|--------------------|--------------|---------|-------|-------------------------|-----------------------------|
| <b>Direction z</b> | 0            | 0.346   | 1.00  | 0.346                   |                             |
|                    | 3            | -0.333  | 0.98  | 0.009                   | 0.64·10 <sup>-8</sup>       |
|                    | 138          | 0.435   | 0.51  | 0.096                   |                             |
|                    | 142          | -0.436  | 0.50  | 0.007                   | 0.51·10 <sup>-8</sup>       |
|                    | 230          | 0.449   | 0.33  | 0.051                   |                             |
|                    | 233          | -0.461  | 0.32  | 0.005                   | <b>0.40·10<sup>-8</sup></b> |
| <b>Direction x</b> | 0            | 0.275   | 1.00  | 0.275                   |                             |
|                    | 2.3          | -0.250  | 0.99  | 0.014                   | 1.06·10 <sup>-8</sup>       |
|                    | 139          | 0.095   | 0.51  | 0.030                   |                             |
|                    | 140          | -0.093  | 0.51  | 0.009                   | 0.20·10 <sup>-8</sup>       |
|                    | 230          | 0.130   | 0.33  | 0.021                   |                             |
|                    | 232          | -0.157  | 0.33  | 0.007                   | <b>0.52·10<sup>-8</sup></b> |
| <b>Direction y</b> | 0            | 0.288   | 1.00  | 0.288                   |                             |
|                    | 2.4          | -0.271  | 0.99  | 0.010                   | 0.76·10 <sup>-8</sup>       |
|                    | 139          | 0.257   | 0.51  | 0.061                   |                             |
|                    | 141          | -0.260  | 0.51  | 0.006                   | 0.50·10 <sup>-8</sup>       |
|                    | 229          | 0.528   | 0.33  | 0.058                   |                             |
|                    | 233          | -0.543  | 0.32  | 0.005                   | <b>0.40·10<sup>-8</sup></b> |

Table ESI 4: Curie constants  $C$  ( $10^{-8} \text{ m}^3 \cdot \text{K} \cdot \text{mol}^{-1}$ ), temperature-independent susceptibilities  $\chi_{TI}$  ( $10^{-8} \text{ m}^3 \cdot \text{mol}^{-1}$ ) and susceptibility at 298 K from SO-CASPT2 calculations and experiment for  $[\text{Pu}(\text{H}_2\text{O})_n]^{3+}$  complexes.  $d_{\text{Pu}-\text{OH}_2}$  is the Pu-O distance ( $\text{\AA}$ ).

|                                             | $d_{\text{Pu}-\text{OH}_2}$ | $C$   | $\chi_{TI}$ | $\chi(298)$ |
|---------------------------------------------|-----------------------------|-------|-------------|-------------|
| $[\text{Pu}(\text{H}_2\text{O})_9]^{3+}$    | 2.49                        | 111.6 | 0.37        | 0.74        |
| $[\text{Pu}(\text{H}_2\text{O})_9]^{3+}$    | 2.39                        | 99.9  | 0.39        | 0.77        |
| $[\text{Pu}(\text{H}_2\text{O})_9]^{3+}$    | 2.59                        | 124.8 | 0.36        | 0.78        |
| $[\text{Pu}(\text{H}_2\text{O})_8]^{3+}$    | 2.39                        | 79.5  | 0.44        | 0.70        |
| $[\text{Pu}(\text{H}_2\text{O})_{10}]^{3+}$ | 2.39                        | 104.4 | 0.39        | 0.75        |
| Exp.                                        |                             | 231.9 | -0.01       | 0.77        |
| Exp. corrected                              |                             | 175.9 | -0.13       | 0.46        |

Table ESI 5: Energy ( $\text{cm}^{-1}$ ) of the free ion levels of  $\text{Am}^{3+}$  calculated with GRASP, SO-CASSCF and SO-CASPT2. 7 septets, 119 quintets and 91 triplets are considered in the SO step for SO-CASSCF and SO-CASPT2.

| $J$ | GRASP | SO-CASSCF | SO-CASPT2 |
|-----|-------|-----------|-----------|
| 0   | 0     | 0         | 0         |
| 1   | 1883  | 2011      | 2569      |
| 2   | 4098  | 4643      | 5775      |
| 3   | 6282  | 7060      | 8436      |
| 4   | 8339  | 9212      | 10601     |
| 5   | 10214 | 11171     | 12454     |
| 6   | 11792 | 12592     | 13530     |
| 0   | 14118 | 16213     | 15235     |

Table ESI 6: Temperature-independent susceptibilities  $\chi_{TI}$  ( $10^{-8} \text{ m}^3 \cdot \text{mol}^{-1}$ ) from SO-CASPT2 calculations for  $\text{Am}^{3+}$ . LS space: states included in the SO calculation; J space: states included in the calculation of  $\chi$ .

| LS space                                   | J space | $\Delta E$ | $\chi_{TI}$ |
|--------------------------------------------|---------|------------|-------------|
| ${}^7\text{F}$                             | 0;1     | 473        | 4.80        |
| ${}^7\text{F}; {}^5\text{D}$               | 0;1     | 1402       | 1.58        |
| ${}^7\text{F}; {}^5\text{D}; {}^3\text{P}$ | 0;1     | 2630       | 0.70        |

Table ESI 7 : Energy gaps  $\Delta E_I$  in  $\text{cm}^{-1}$ , magnetic moments  $M_I^u$  in  $\mu_B$ , Boltzmann weights  $P_I$ , truncated magnetization  $M_u^{0 \rightarrow k}$  in  $\mu_B$  and magnetic susceptibility  $\chi_M$  in  $\text{m}^3 \cdot \text{mol}^{-1}$  for  $[\text{Am}(\text{H}_2\text{O})_9]^{3+}$  in a magnetic field of 9.4 Tesla and at  $T=298$  K. Diagonalization of Hamiltonian of Eq. (1) is performed with 4 electronic states.

|                    | $\Delta E_I$ | $M_I^u$  | $P_I$   | $M_u^{0 \rightarrow k}$ | $\chi_M$              |
|--------------------|--------------|----------|---------|-------------------------|-----------------------|
| <b>Direction z</b> | 0            | 0.01192  | 1.00    | 0.01192                 | $0.890 \cdot 10^{-8}$ |
|                    | 2309         | -0.0071  | 0.00002 | 0.01192                 |                       |
|                    | 2313         | 0.15792  | 0.00002 | 0.01192                 |                       |
|                    | 2430         | -0.16274 | 0.00001 | 0.01192                 |                       |
| <b>Direction x</b> | 0            | 0.01188  | 1.00    | 0.01188                 | $0.887 \cdot 10^{-8}$ |
|                    | 2308         | 0.15422  | 0.00002 | 0.01188                 |                       |
|                    | 2313         | -0.00886 | 0.00002 | 0.01188                 |                       |
|                    | 2430         | -0.15724 | 0.00001 | 0.01188                 |                       |
| <b>Direction y</b> | 0            | 0.01076  | 1.00    | 0.01076                 | $0.803 \cdot 10^{-8}$ |
|                    | 2304         | 1.42244  | 0.00002 | 0.01079                 |                       |
|                    | 2318         | -1.42242 | 0.00001 | 0.01077                 |                       |
|                    | 2430         | -0.01076 | 0.00001 | 0.01077                 |                       |

Table ESI 8 : Energy ( $\text{cm}^{-1}$ ) of the free ion levels of  $\text{Cm}^{3+}$  calculated with GRASP, SO-CASSCF and SO-CASPT2. 1 octuplet, 48 sextets and 76 quartets are considered in the SO step for SO-CASSCF and SO-CASPT2.

| $J$ | GRASP | SO-CASSCF | SO-CASPT2 |
|-----|-------|-----------|-----------|
| 5/2 | 0     | 0         | 0         |
| 7/2 | 25028 | 28011     | 23546     |
| 5/2 | 27459 | 28818     | 23896     |
| 7/2 | 28810 | 31302     | 28331     |
| 3/2 | 29348 | 32367     | 27641     |
| 9/2 | 30412 | 32568     | 29623     |

Table ESI 9 : Energy gaps  $\Delta E_I$  in  $\text{cm}^{-1}$ , magnetic moments  $M_I^u$  in  $\mu_B$ , Boltzmann weights  $P_I$ , truncated magnetization  $M_u^{0 \rightarrow k}$  in  $\mu_B$  and magnetic susceptibility  $\chi_M$  in  $\text{m}^3 \cdot \text{mol}^{-1}$  for  $\text{Cm}^{3+}$  in a magnetic field of 9.4 Tesla and at  $T=298$  K. Diagonalization of Hamiltonian of Eq. (1) is performed with 8 electronic states.

|                           | $\Delta E_I$ | $M_I^u$ | $P_I$ | $M_u^{0 \rightarrow k}$ | $\chi_M$              |
|---------------------------|--------------|---------|-------|-------------------------|-----------------------|
| <b>Directions x, y, z</b> | 0            | 6.17    | 1.00  | 6.17                    | $4.604 \cdot 10^{-6}$ |
|                           | 7            | 2.61    | 0.97  | 4.42                    | $3.298 \cdot 10^{-6}$ |
|                           | 10           | 4.07    | 0.95  | 4.31                    | $3.216 \cdot 10^{-6}$ |
|                           | 18           | 0.48    | 0.92  | 3.39                    | $2.530 \cdot 10^{-6}$ |
|                           | 36           | -0.52   | 0.84  | 2.69                    | $2.007 \cdot 10^{-6}$ |
|                           | 42           | 2.29    | 0.81  | 1.95                    | $1.455 \cdot 10^{-6}$ |
|                           | 55           | 4.49    | 0.77  | 1.16                    | $8.657 \cdot 10^{-7}$ |
|                           | 66           | 6.03    | 0.73  | 0.41                    | $3.060 \cdot 10^{-7}$ |

Table ESI 10 : Energy gaps  $\Delta E_I$  in  $\text{cm}^{-1}$ , magnetic moments  $M_I^u$  in  $\mu_B$ , Boltzmann weights  $P_I$ , truncated magnetization  $M_u^{0 \rightarrow k}$  in  $\mu_B$  and magnetic susceptibility  $\chi_M$  in  $\text{m}^3 \cdot \text{mol}^{-1}$  for  $[\text{Cm}(\text{H}_2\text{O})_9]^{3+}$  in a magnetic field of 9.4 Tesla and at  $T=298$  K. Diagonalization of Hamiltonian of Eq. (1) is performed with 8 electronic states.

|                    | $\Delta E_I$ | $M_I^u$ | $P_I$ | $M_u^{0 \rightarrow k}$ | $\chi_M$                                |
|--------------------|--------------|---------|-------|-------------------------|-----------------------------------------|
| <b>Direction z</b> | 0            | 6.69    | 1.00  | 6.69                    | $4.992 \cdot 10^{-6}$                   |
|                    | 26           | 4.37    | 0.88  | 5.60                    | $4.179 \cdot 10^{-6}$                   |
|                    | 34           | 1.61    | 0.85  | 4.37                    | $3.261 \cdot 10^{-6}$                   |
|                    | 42           | 1.13    | 0.82  | 3.62                    | $2.701 \cdot 10^{-6}$                   |
|                    | 45           | -3.35   | 0.80  | 2.89                    | $2.157 \cdot 10^{-6}$                   |
|                    | 60           | -5.96   | 0.75  | 1.59                    | $1.187 \cdot 10^{-6}$                   |
|                    | 65           | -3.32   | 0.73  | 0.97                    | $7.239 \cdot 10^{-7}$                   |
|                    | 75           | -4.17   | 0.69  | 0.43                    | <b><math>3.209 \cdot 10^{-7}</math></b> |
| <b>Direction x</b> | 0            | 6.27    | 1.00  | 6.27                    | $4.679 \cdot 10^{-6}$                   |
|                    | 6            | 3.30    | 0.97  | 4.80                    | $3.582 \cdot 10^{-6}$                   |
|                    | 13           | 2.44    | 0.94  | 4.04                    | $3.015 \cdot 10^{-6}$                   |
|                    | 19           | 1.10    | 0.91  | 3.34                    | $2.492 \cdot 10^{-6}$                   |
|                    | 35           | 0.35    | 0.84  | 2.80                    | $2.090 \cdot 10^{-6}$                   |
|                    | 43           | -2.91   | 0.81  | 1.95                    | $1.455 \cdot 10^{-6}$                   |
|                    | 55           | -4.67   | 0.77  | 1.16                    | $8.657 \cdot 10^{-7}$                   |
|                    | 67           | -5.89   | 0.72  | 0.41                    | <b><math>3.060 \cdot 10^{-7}</math></b> |
| <b>Direction y</b> | 0            | 5.71    | 1.00  | 6.71                    | $5.007 \cdot 10^{-6}$                   |
|                    | 5            | 4.13    | 0.97  | 4.93                    | $3.679 \cdot 10^{-6}$                   |
|                    | 12           | 2.39    | 0.94  | 4.11                    | $3.067 \cdot 10^{-6}$                   |
|                    | 23           | 0.99    | 0.89  | 3.37                    | $2.515 \cdot 10^{-6}$                   |
|                    | 36           | -0.06   | 0.84  | 2.75                    | $2.052 \cdot 10^{-6}$                   |
|                    | 53           | -2.39   | 0.82  | 1.98                    | $1.478 \cdot 10^{-6}$                   |
|                    | 68           | -4.79   | 0.77  | 1.14                    | $8.507 \cdot 10^{-7}$                   |
|                    | 66           | -5.98   | 0.71  | 0.41                    | <b><math>3.060 \cdot 10^{-7}</math></b> |

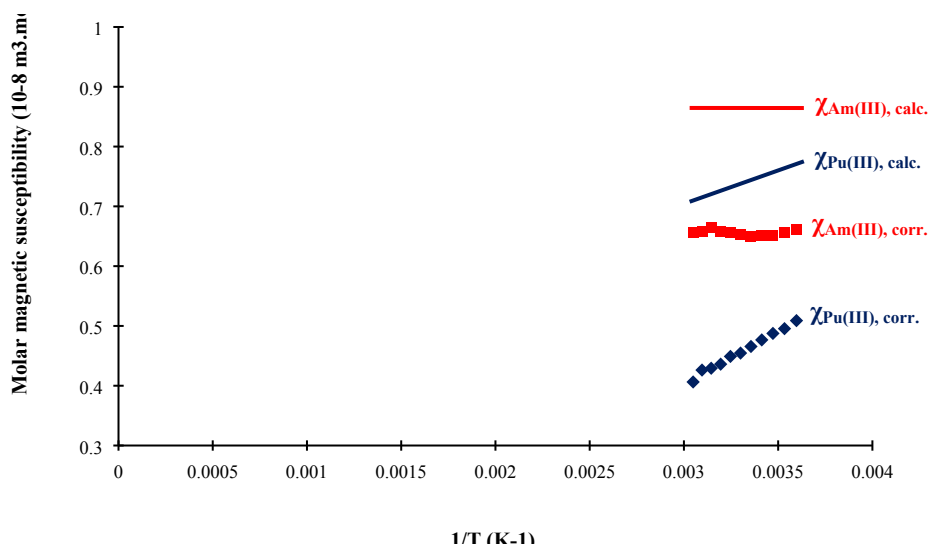

Figure ESI 8 : Experimental molar magnetic susceptibility variation vs.  $1/T$  for sample 1-1 and 2 after correction of their  $\alpha$  and  $\beta$  radioactivity in 1M perchloric medium ( $\chi_{\text{Am(III), corr.}}$  and  $\chi_{\text{Pu(III), corr.}}$ ) and calculated for  $[\text{Am}(\text{H}_2\text{O})_9]^{3+}$  and  $[\text{Pu}(\text{H}_2\text{O})_9]^{3+}$  ( $\chi_{\text{Am(III), calc.}}$  and  $\chi_{\text{Pu(III), calc.}}$ ).
